# Supplementary material for: Climate change stands as the new challenge for whale watching and North Pacific gray whales (Eschrichtius robustus) in Bahia Magdalena, Mexico, after their recovery from overexploitation
Source: Frontiers journal article supplement (doi:10.3389/fcosc.2024.1397204), 2024-10-01
Supplement: Table_1.docx [file Table_1.docx]

Supplementary Material

**Supplemental Table I.** Compliance record format for NOM-131-SEMARNAT-2010 for whale watching.

| **Date:** |  |  |  |  |  |  |  |  |
| --- | --- | --- | --- | --- | --- | --- | --- | --- |
| **Location:** |  |  |  |  |  |  |  |  |
| Time | Latitude | longitude | Group size | Group composition | Behavior prior to vessel presence | Behavior  response | Number of vessels | Violated guideline of NOM |

**Supplemental Table II.** Interviews with tour operators

| **Tour operator’s characteristics** |
| --- |
| 1. Years living in the town: |
| 1. Time working with whale watching: |
| 1. Do you have another job besides AB? |
| 1. AB Industry Position: |
| 1. How important is the whale to you? A lot, more or less, a little. |
| 1. If I mention the word whale, think of A) A living being equal to humans, ally. B). An animal, a resource. |
| **Whale Watching Description** |
| 1. Describe a typical day; how do you do the activity? (From the moment the tourist makes contact until he or she is dismissed): |
| 1. Do you make changes every year in the management of the activity? As which? |
| 1. Do you offer tourists other activities extra to the AB? Which is it? |
| 1. Do you think even more activities could be offered? |
| 1. Have you noticed that tourists have other interests besides whales? Which is it? |
| 1. Does it offer the necessary amount of information about the whale and the place to the tourist? |
| **Tourist demands** |
| 1. What do you think are the basic demands of tourists in the AB? ( |
| 1. See many whales b) See mothers with calves c) See diving d) Touch the whales c) swim with the whales d) Information about the whales e) Do other activities, for example, eat something local, see more nature. |
| 1. Have these demands been the same, or have they changed over the years? |
| 1. Would you like to train yourself to learn new things that tourists might like? (English, whale biology, history, NOM) |
|  |
| **Aspects of the NOM** |
| 1. Do you know about NOM-131? |
| 1. Do you think it is valuable? a) nothing, b) more or less, and c) a lot. Because? |
| 1. Would you like to modify something? |
| 1. From 1 to 5, where one is tiny, and 5 is 100%, how much do your fellow tour operators apply to the NOM? |
| **Governance** |
| 1. Do you think some leaders make the most critical decisions? Who are they, how old are they? |
| 1. Are young people interested in the activity? Would you like them to be more interested? |
| 1. Do you think surveillance committees are essential? Because? Have you developed any? |
| **Climate change** |
| 1. Have you heard about climate change? What have you heard? |
| 1. How could the effects be faced in the area so that the WW is not so affected? |
| 1. Would you like to learn more about climate change and the expected effects for the area? |
| **Economic aspects** |
| 1. Did you invest when you started this activity? |
| 1. Do you invest money every year prior to the season? How much? |
| 1. How much profit do you have left? |
| 1. What percentage of annual income does the AB represent? |
| 1. Do more people work with you? How much do you pay them? |
| 1. Do you consider tourism to have been affected by the COVID-19 pandemic? In what percentage has it affected your income? |
| 1. Would you like to receive some type of support to help reduce the impact of the pandemic? |
| 1. What is the date when you have the highest number of tourists arriving? |

**Supplemental Table III.** Survey questions for tourists

| **Multiple Choice** |
| --- |
| 1. Number of times you have engaged in whale watching activity at the location. |
| 1. Main reason for visiting the site. |
| 1. Who you engage in the activity with. |
| 1. How many times you have engaged in any other ecotourism activity. |
| 1. Sociodemographic characteristics. |
| **Likert Scale** |
| 1. 2.1 Level of interest in the activity. |
| 1. 2.2 Level of satisfaction with the information provided. |
| 1. 2.3 Level of satisfaction with the number of vessels in the whale watching area. |
| 1. Overall satisfaction level with the service received. |
| 1. Level of satisfaction with the quantity of whales observed. |
| 1. Level of satisfaction with the quantity of mother-calf pairs observed. |
| 1. 2.7 Appreciation of compliance with NOM-131-SEMARNAT-2010 by your vessel. |
| 1. 2.8 Level of empathy towards the whales. |
| 1. 2.9 Appreciation of gaining environmental awareness. |
| 1. 2.10 Level of empathy towards the whales. |
| 1. 2.11 Scenarios under which you would be willing to return (number of vessels, Amount of information received, Number of mother-calf pairs, total number of whales). |
| **Open-ended Questions** |
| 1. What did you like the most about the whole experience? |
| 1. What did you like the least about the whole experience? |
